# Supplementary material
Source: ML conference proceedings conference paper supplement (https://aclanthology.org/D19-1434)
Supplement: Attachment [file D19-1434.Attachment.zip]

Archive with 5 entries (4 files):
- appendices.pdf
- fit_irt_svi.py
- models/
- models/irt.py
- README.txt
